# Supplementary material for: Multicolor-Raman analysis of Korean paintworks: emission-like Raman collection efficiency
Source: Royal Society of Chemistry journal article supplement (doi:10.1039/d0an02363a), 2021-01-01

Supporting Information for

## **Multicolor-Raman Analysis of Korean Paintworks: Emission-like Raman Collection Efficiency**

Chang Hyun Bae,<sup>a</sup> Si Won Song,<sup>a</sup> Soo Yeong Lim,<sup>a</sup> Seonyoung Yoo,<sup>b</sup> Chang Sug Lee,<sup>c</sup> Chan Ryang Park,<sup>a</sup> Gyuho Kim,<sup>\*b</sup> and Hyung Min Kim <sup>\*a</sup>

<sup>a</sup>. Department of Chemistry, Kookmin University, 77 Jeongneung-ro, Seongbuk-gu, Seoul, 02707, Republic of Korea

<sup>b</sup>. Department of Cultural Heritage Conservation Science, Kongju National University, 56 Gongjudaehak-ro, Gongju-si, Chungcheongnam-do, 32588, Republic of Korea

<sup>c</sup>. Korea Spectral Products, 273 Digital-ro, Guro-gu, Seoul, 08381, Republic of Korea

\*Correspondence :

Prof. Hyung Min Kim

Department of Chemistry

Kookmin University

77 Jeongneung-ro, Seongbuk-gu, Seoul, 02707, Republic of Korea

E-mail : [hyungkim@kookmin.ac.kr](mailto:hyungkim@kookmin.ac.kr)

Prof. Gyuho Kim

Department of Cultural Heritage Conservation Science

Kongju National University

56 Gongjudaehak-ro, Gongju-si, Chungcheongman-do, 32588, Republic of Korea

E-mail : [kimgh@kongju.ac.kr](mailto:kimgh@kongju.ac.kr)

Figure S1. (a) sectional image of of Yang-cheong (I) and (b) all pigment thickness on wood board.

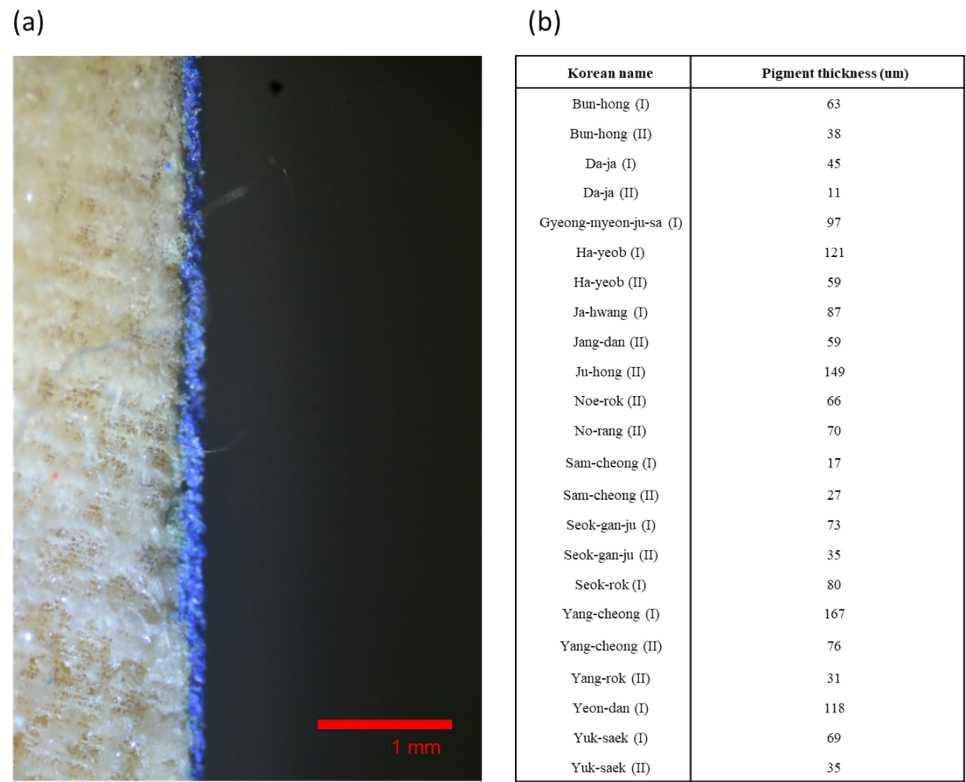

Figure S2. (a) beam profile image of 488 nm laser and (b) all diameter and are of laser.

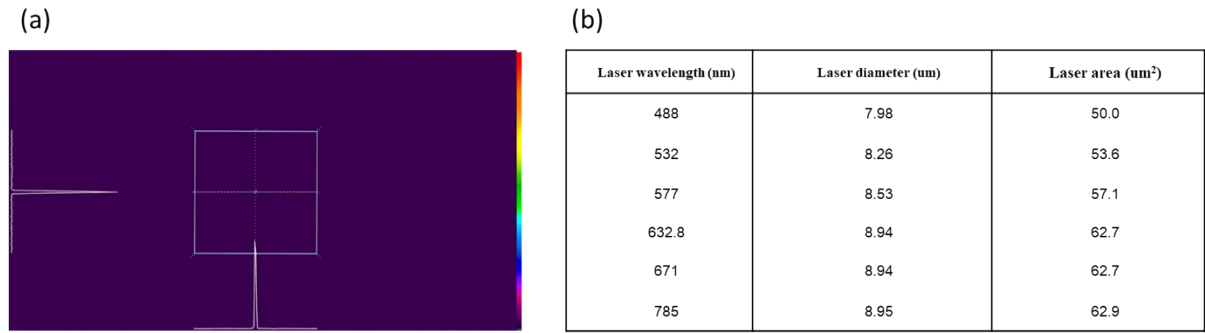

Figure S3. (a) optical image of wood board with animal glue and (b) Raman background.

(a)

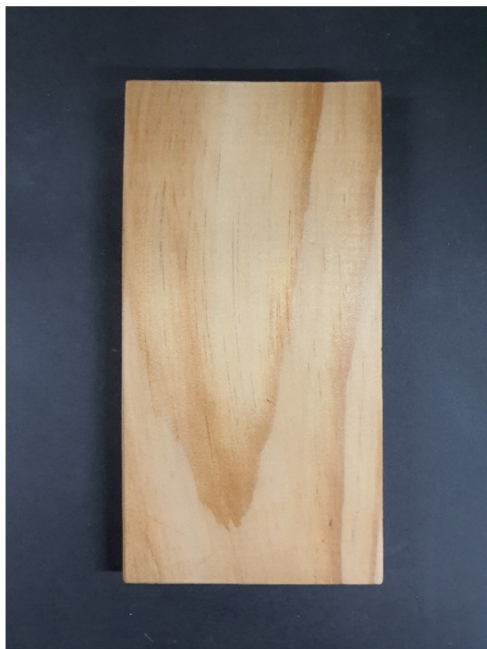

(b)

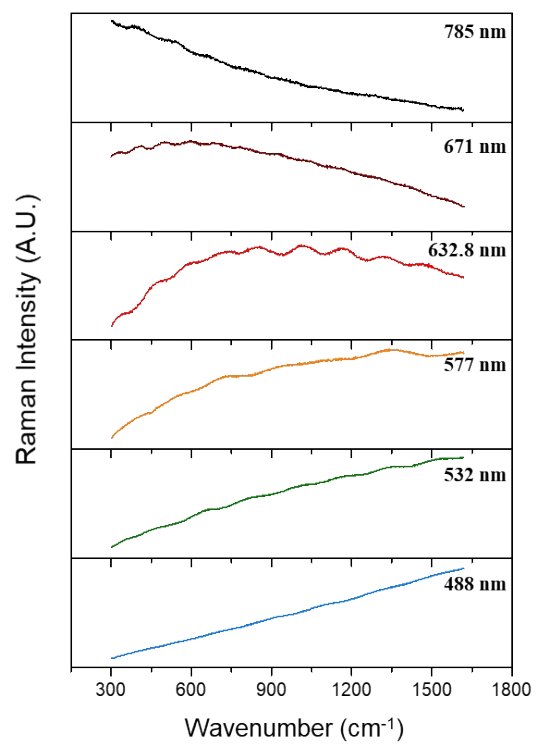

Figure S4. Ratio of Raman intensity according to vibration mode. The ratio was calculated by dividing by the Raman signal of the 488 nm excitation laser.

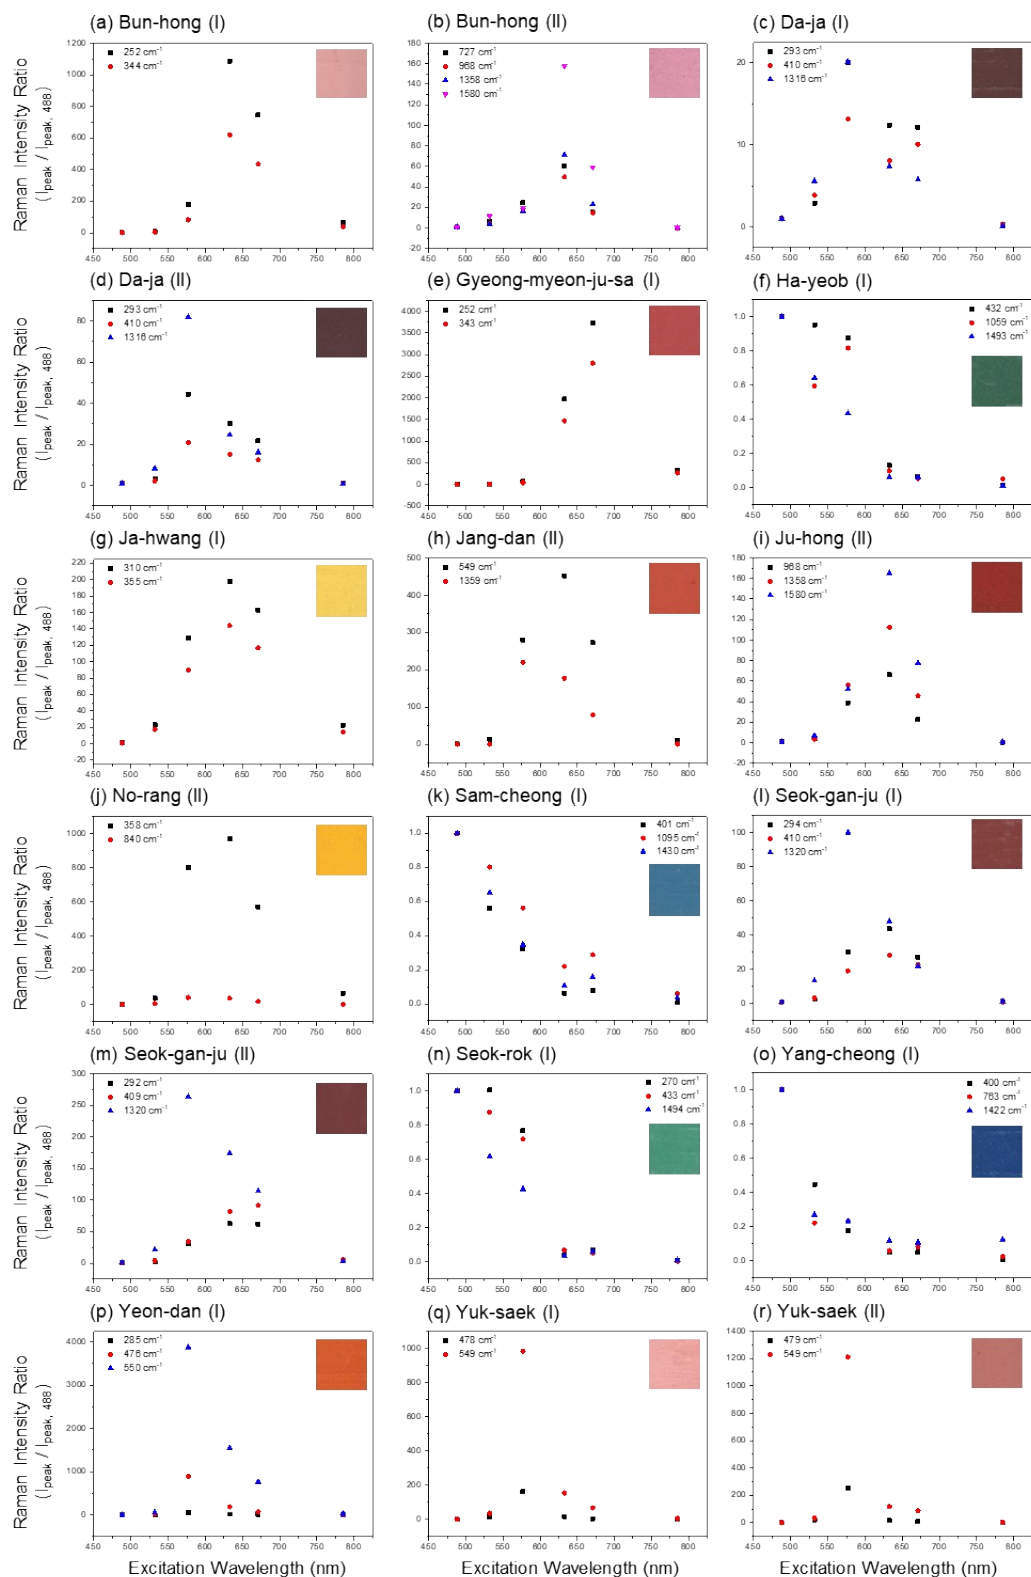

Figure S5. Photographic, microscopic image, absorption, fluorescence and Raman spectra of All the Dancheong pigments.

**Bun-hong (I), Cinnabar + Oyster shell white,  $\text{HgS} + \text{CaCO}_3$  (N4)**

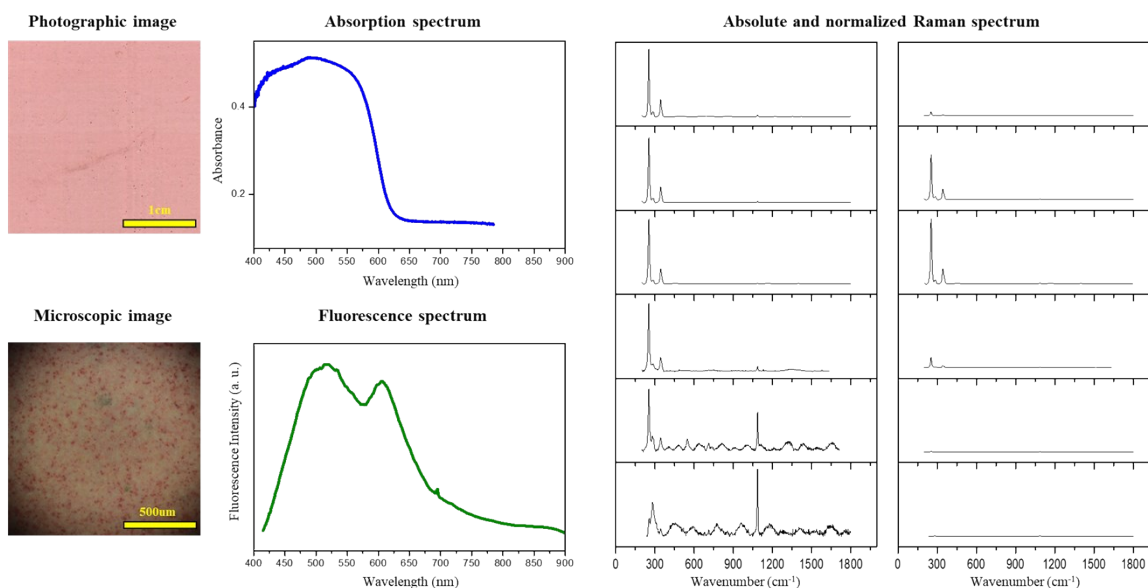

**Bun-hong (II), PR 112 + Titanium white,  $\text{C}_{24}\text{H}_{16}\text{Cl}_3\text{N}_3\text{O}_2 + \text{TiO}_2$  (C4)**

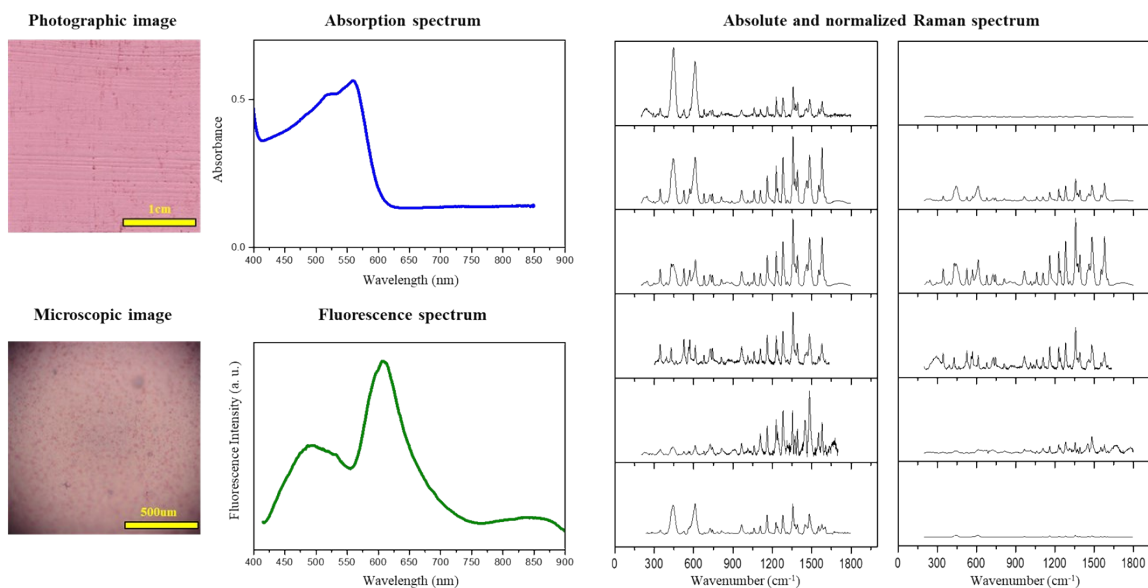

**Da-ja (I), Iron oxide red + Chinese ink,  $\text{Fe}_2\text{O}_3 + \text{C}$  (N13)**

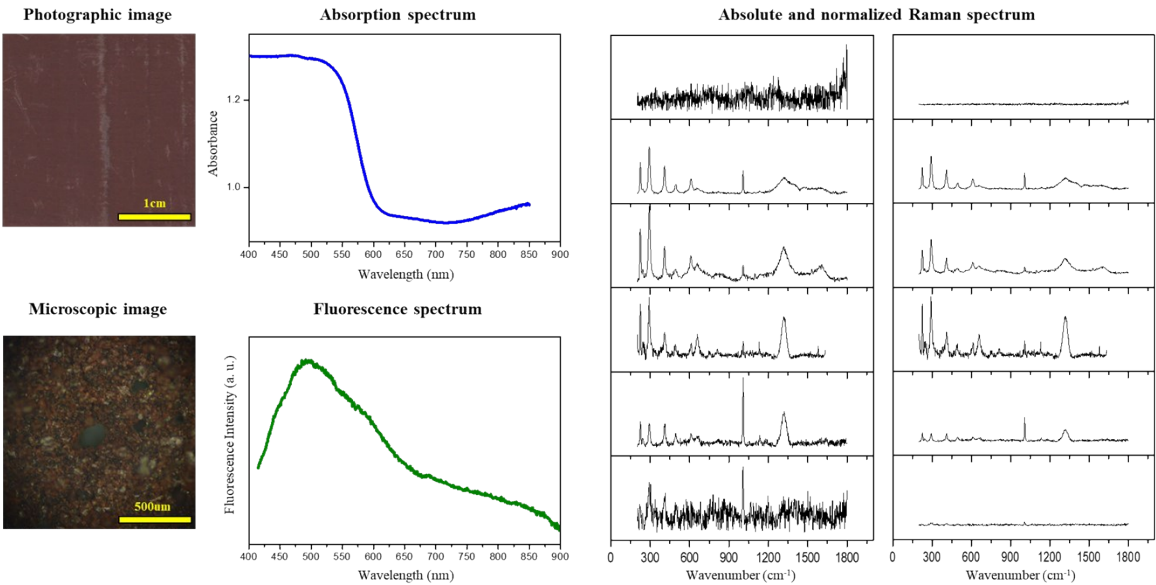

**Da-ja (II), Iron oxide red + Carbon black,  $\text{Fe}_2\text{O}_3 + \text{C}$  (C13)**

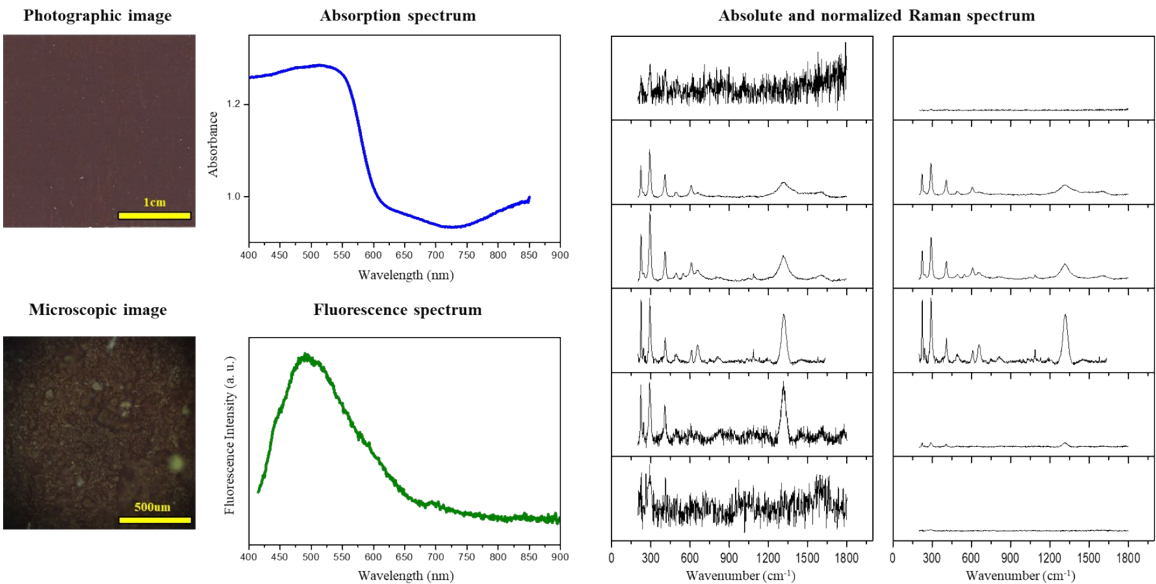

Gyeong-myeon-ju-sa (I), Cinnabar, HgS (N3)

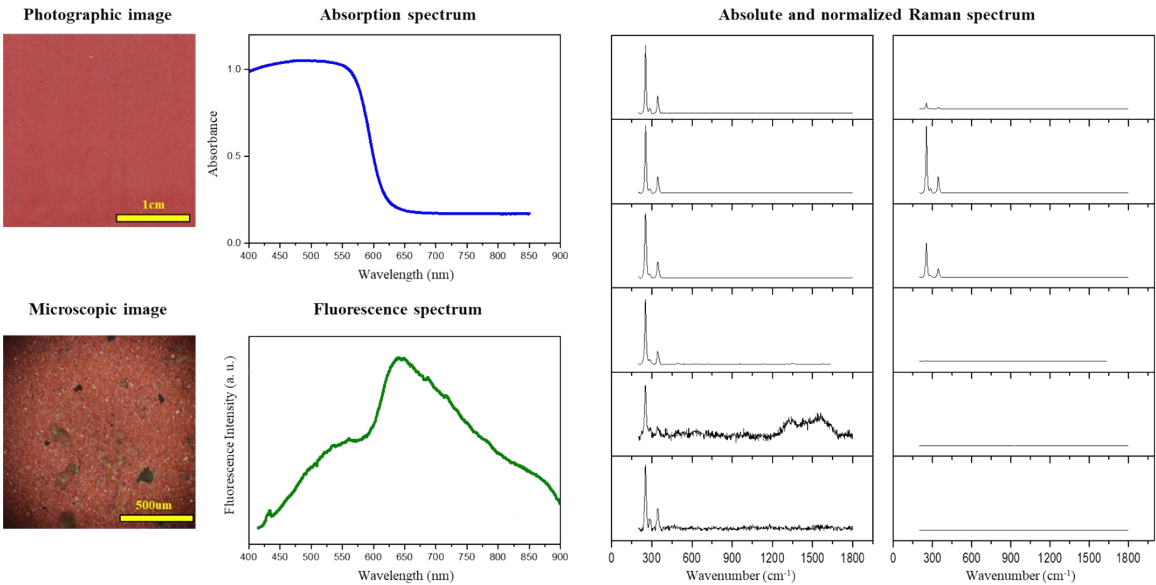

Ha-yeob (I), Malachite, Cu<sub>2</sub>CO<sub>3</sub>(OH)<sub>2</sub> (N9)

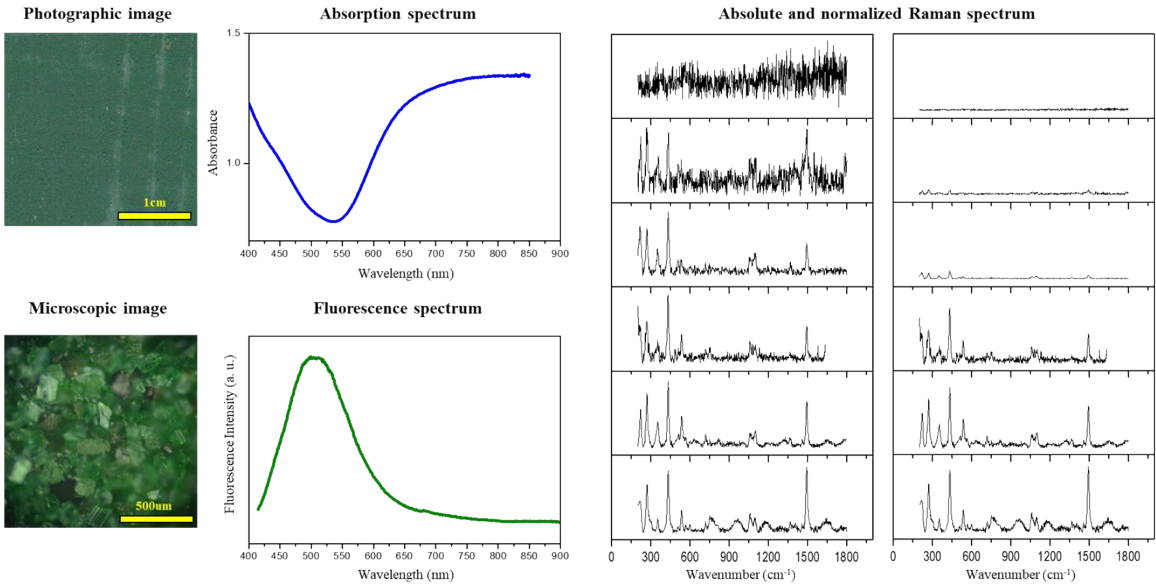

Ha-yeob (II), Phthalocyanine blue + Chrome oxide green,  $C_{32}H_{16}CuN_8 + Cr_2O_3$  (C9)

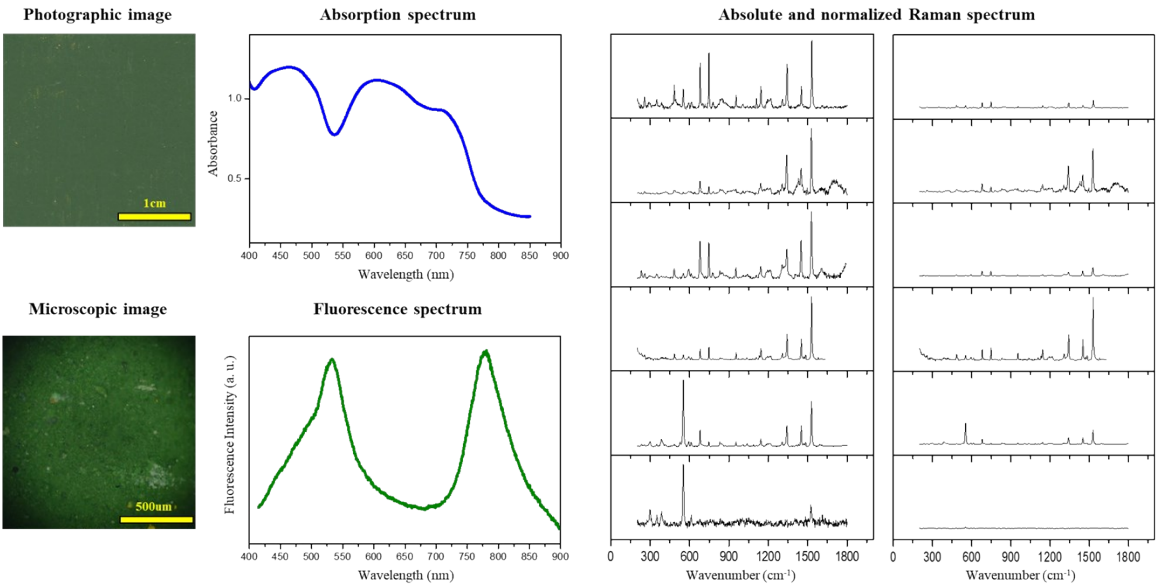

Ja-hwang (I), Orpiment,  $As_2S_3$  (N7)

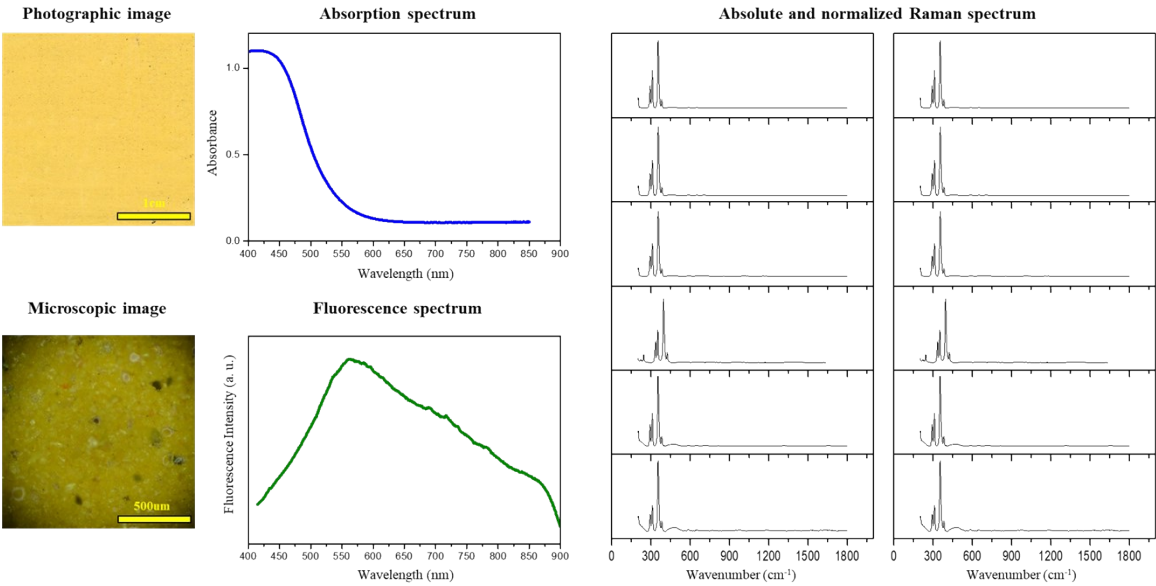



**Jang-dan (II), Red lead,  $\text{Pb}_3\text{O}_4$  (C5)**

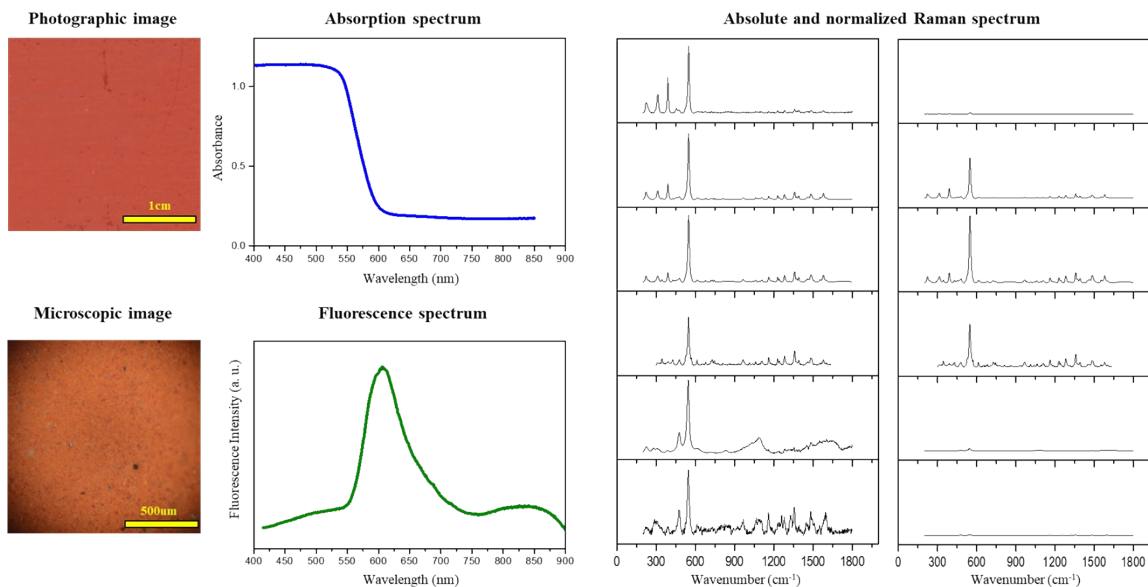

**Ju-hong (II), PR 112,  $\text{C}_{24}\text{H}_{16}\text{Cl}_3\text{N}_3\text{O}_2$  (C3)**

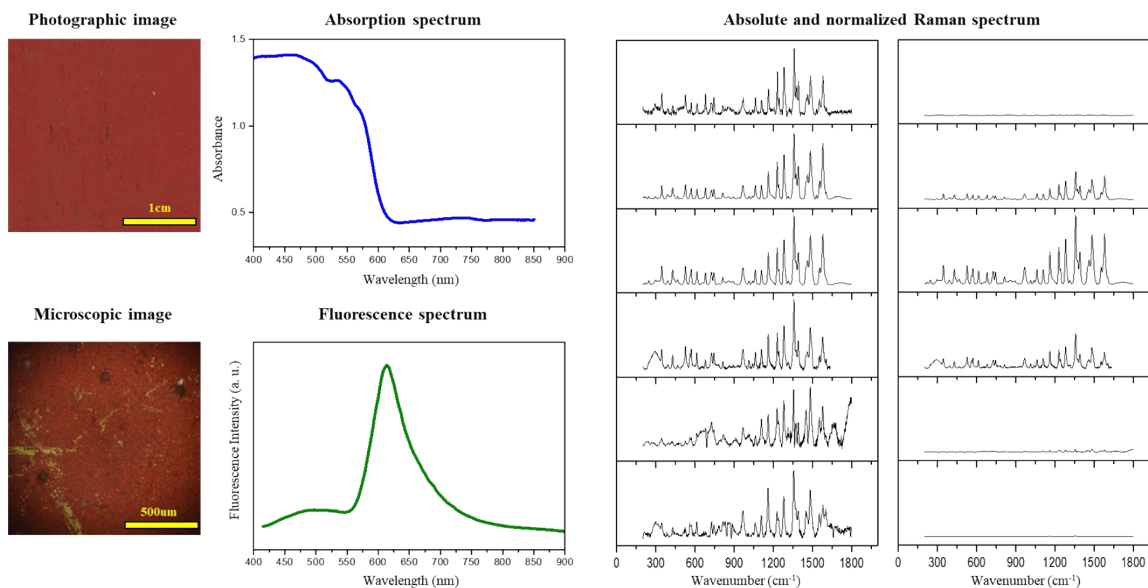

**Noe-rok (II), Phthalocyanine blue,  $C_{32}H_{16}CuN_8$  (C8)**

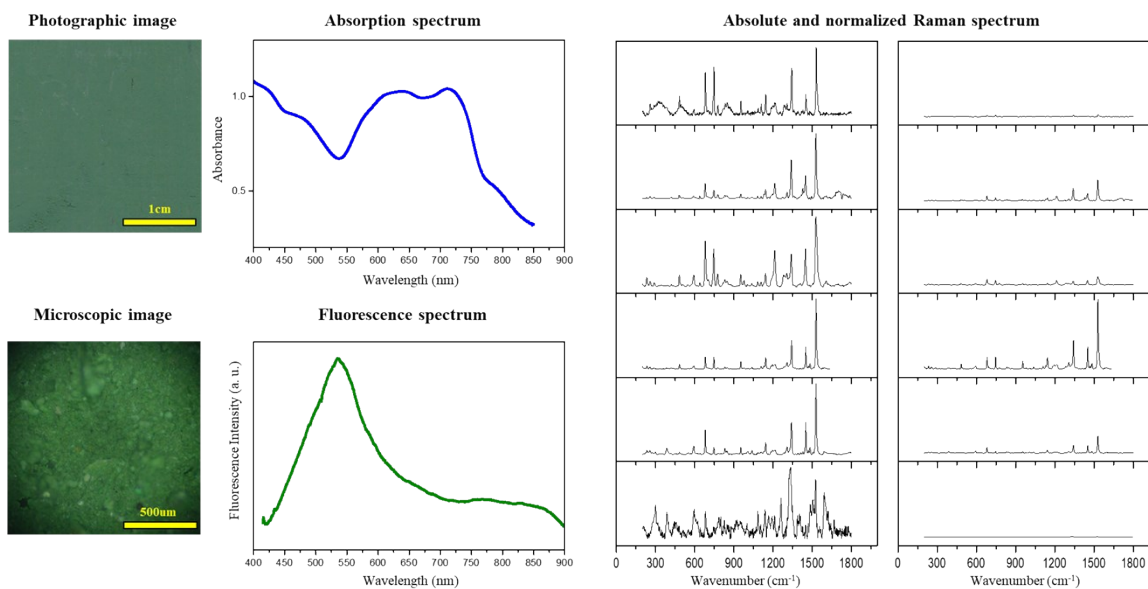

**No-rang (II), Chrome yellow,  $PbCrO_4$  (C7)**

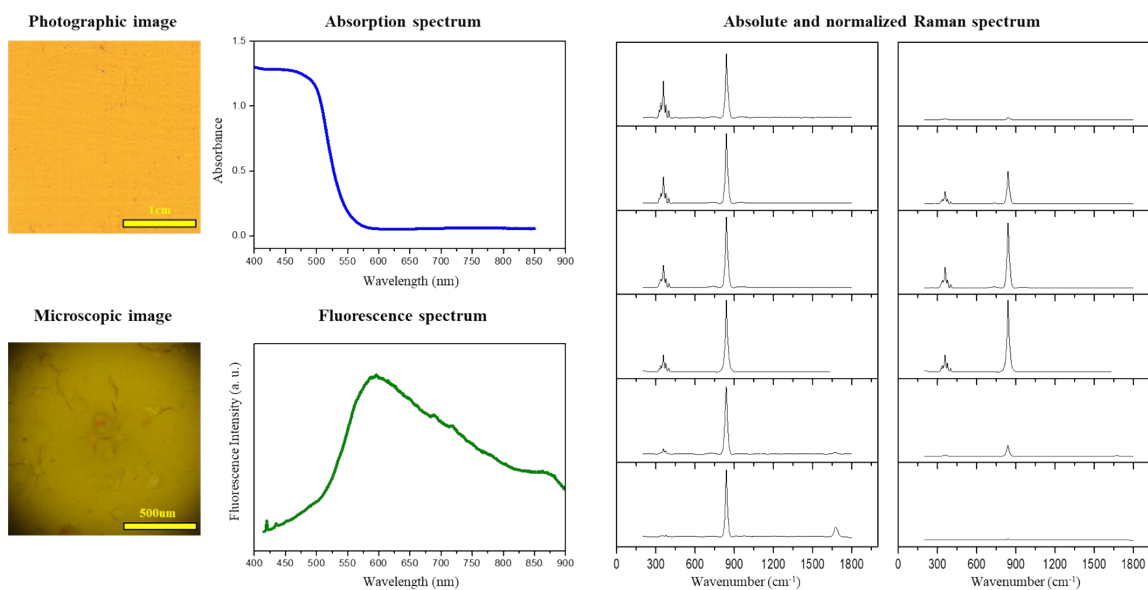

Sam-cheong (I), Azurite,  $\text{Cu}_3(\text{CO}_3)_2(\text{OH})_2$  (N12)

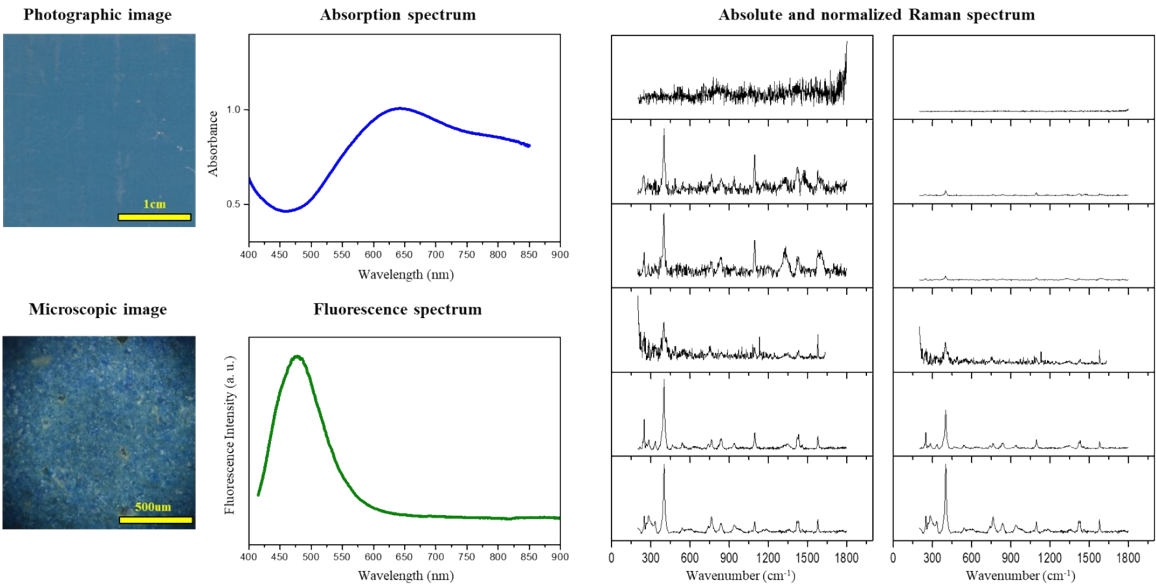

Sam-cheong (II), Lazurite + Titanium white,  $(\text{Na,Ca})_8[(\text{S,Cl,SO}_4,\text{OH})_2](\text{Al}_6\text{Si}_6\text{O}_{24}) + \text{TiO}_2$  (C12)

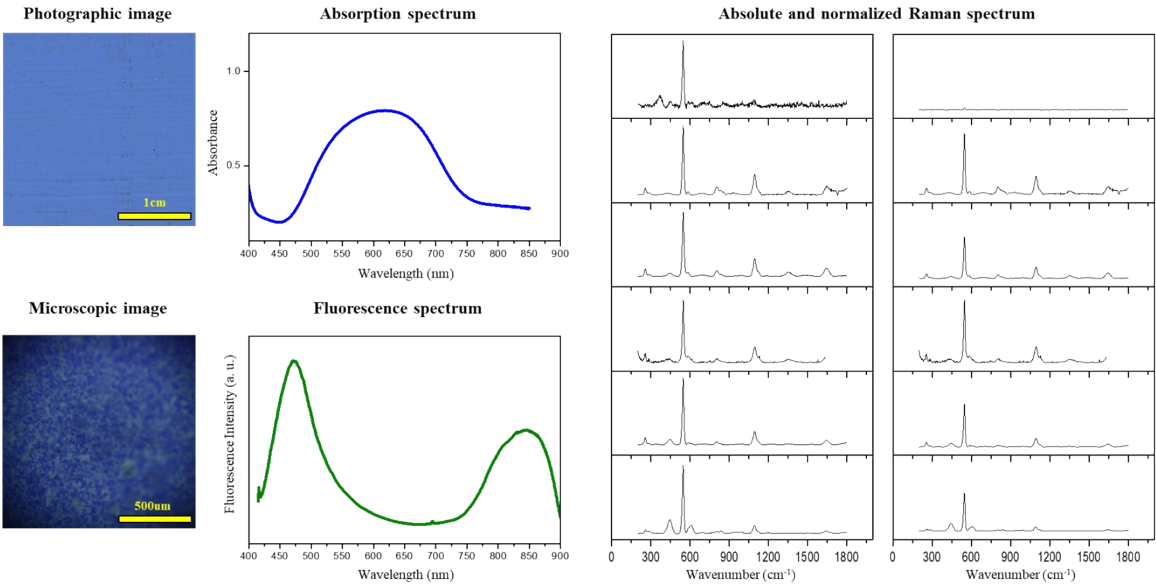

Seok-gan-ju (I), Iron oxide red + anhydrite,  $\text{Fe}_2\text{O}_3$  +  $\text{CaSO}_4$  (N14)

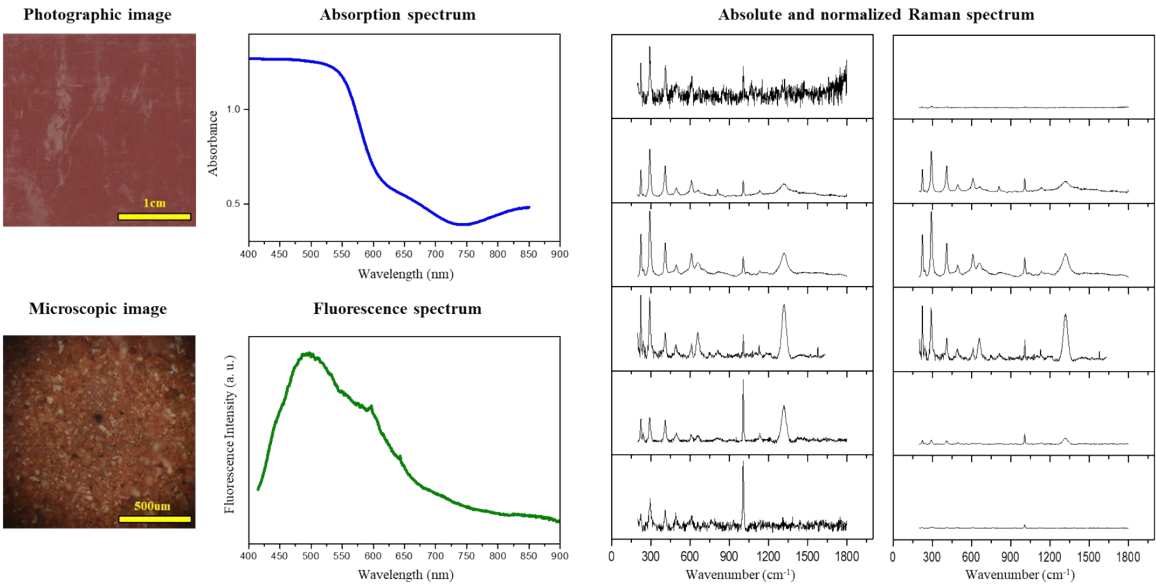

Seok-gan-ju (II), Iron oxide red,  $\text{Fe}_2\text{O}_3$  (C14)

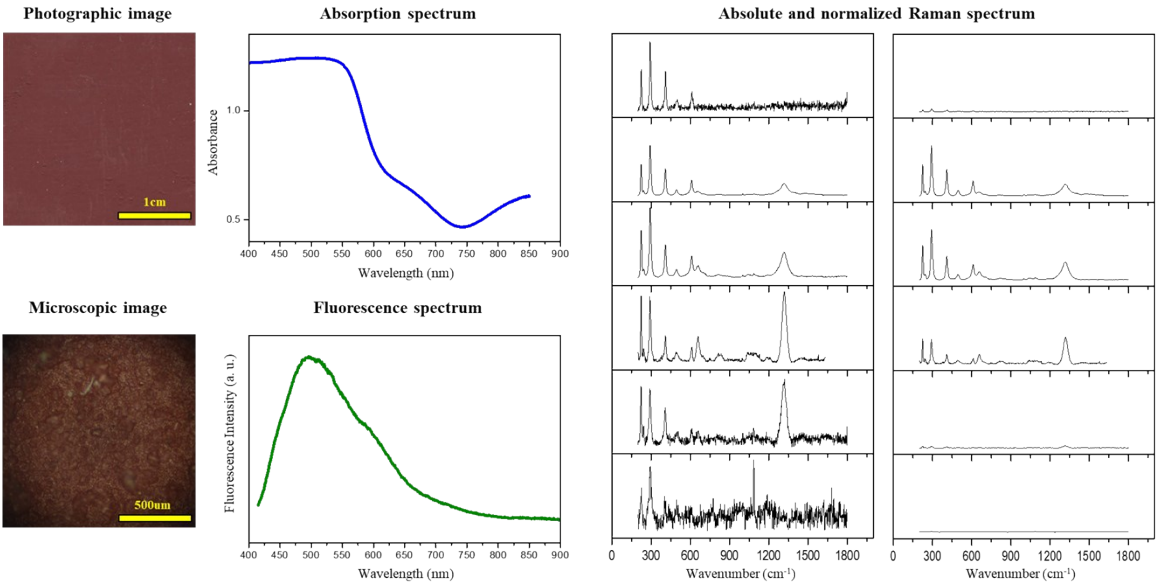

**Seok-rok (I), Malachite,  $\text{Cu}_2\text{CO}_3(\text{OH})_2$  (N10)**

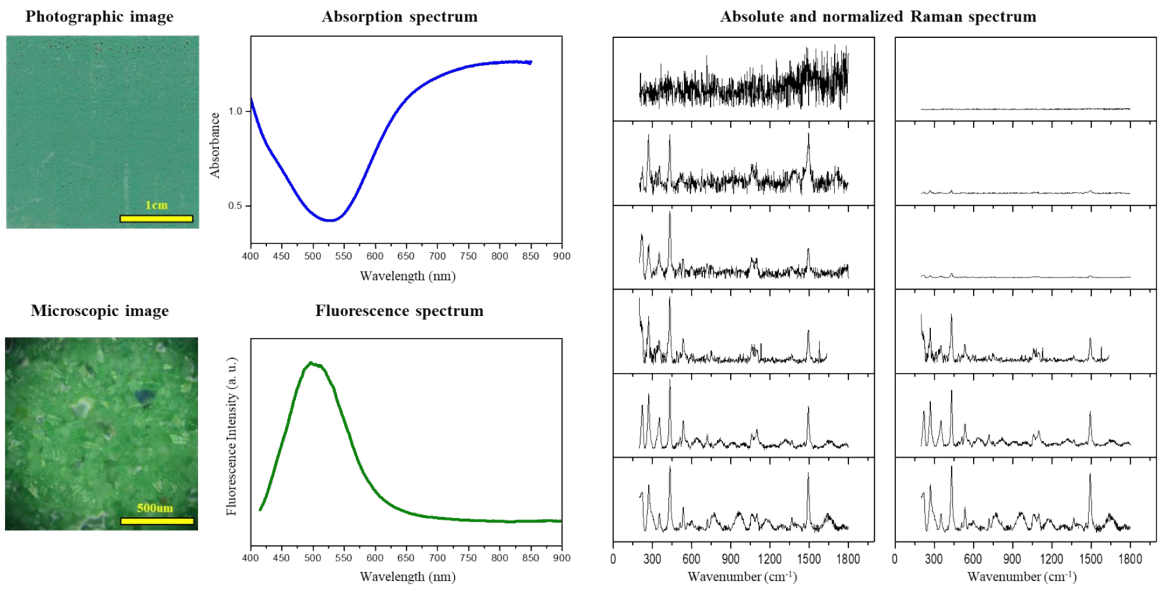

**Yang-cheong (I), Azurite,  $\text{Cu}_3(\text{CO}_3)_2(\text{OH})_2$  (N11)**

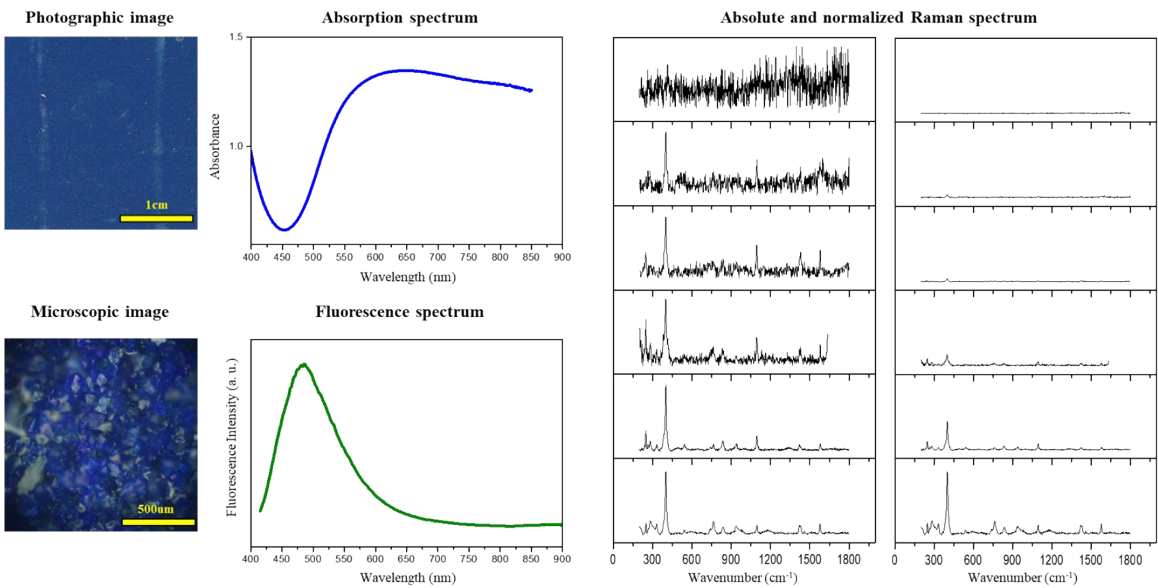

**Yang-cheong (II), Lazurite,  $(\text{Na,Ca})_8[(\text{S,Cl,SO}_4,\text{OH})_2](\text{Al}_6\text{Si}_6\text{O}_{24})$  (C11)**

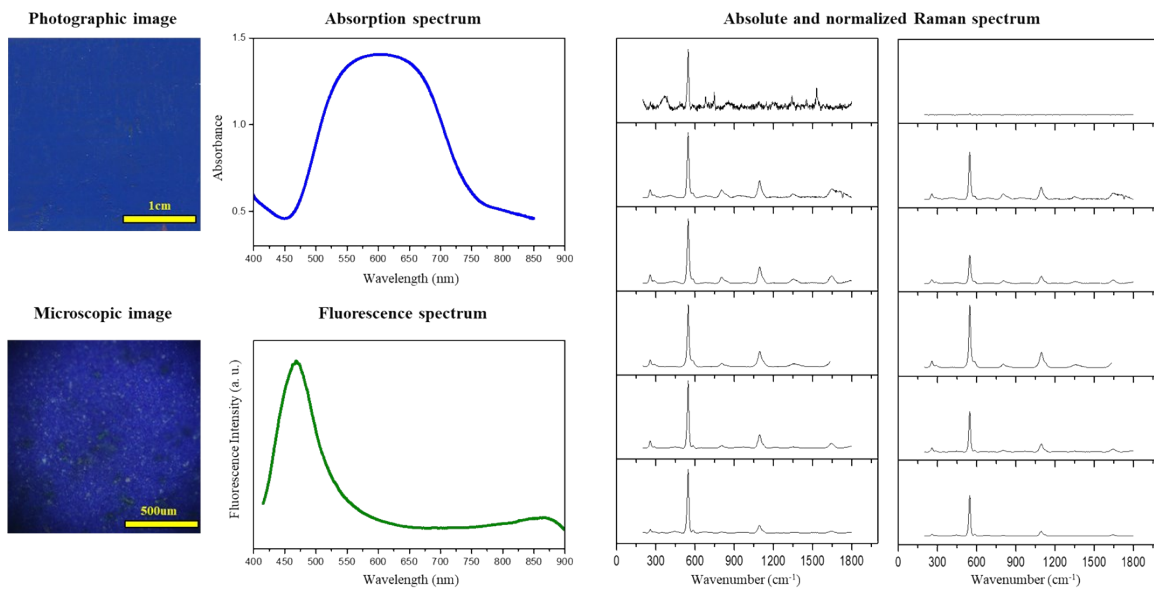

**Yang-rok (II), Phthalocyanine green,  $\text{C}_{32}\text{Cl}_{16}\text{CuN}_8$  (C10)**

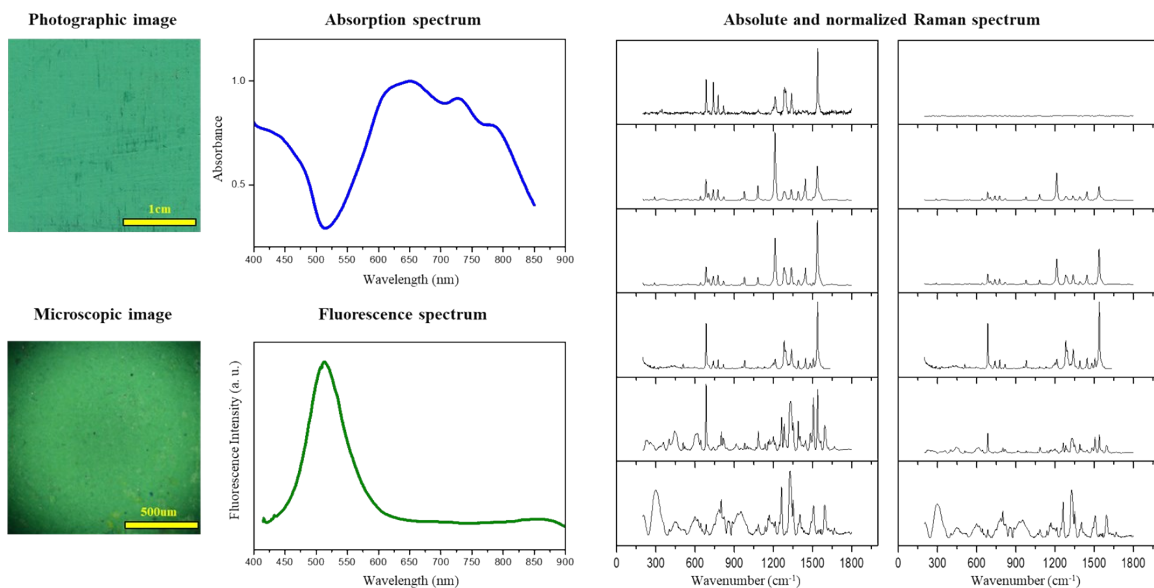

**Yeon-dan (I), Red lead,  $\text{Pb}_3\text{O}_4$  (N5)**

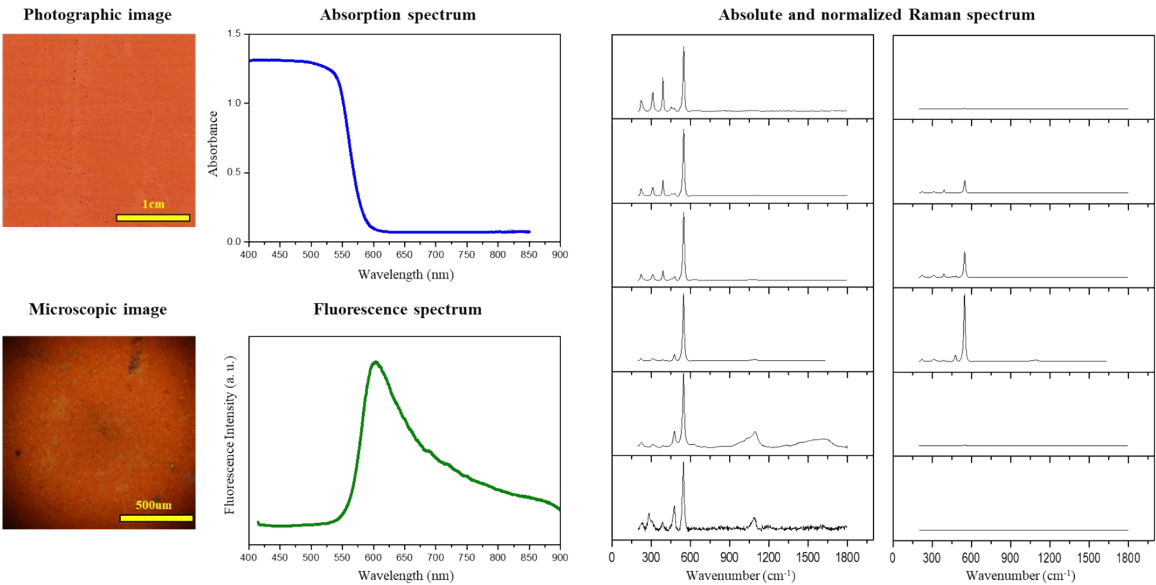

**Yuk-saek (I), Red lead + Oyster shell white,  $\text{Pb}_3\text{O}_4 + \text{CaCO}_3$  (N6)**

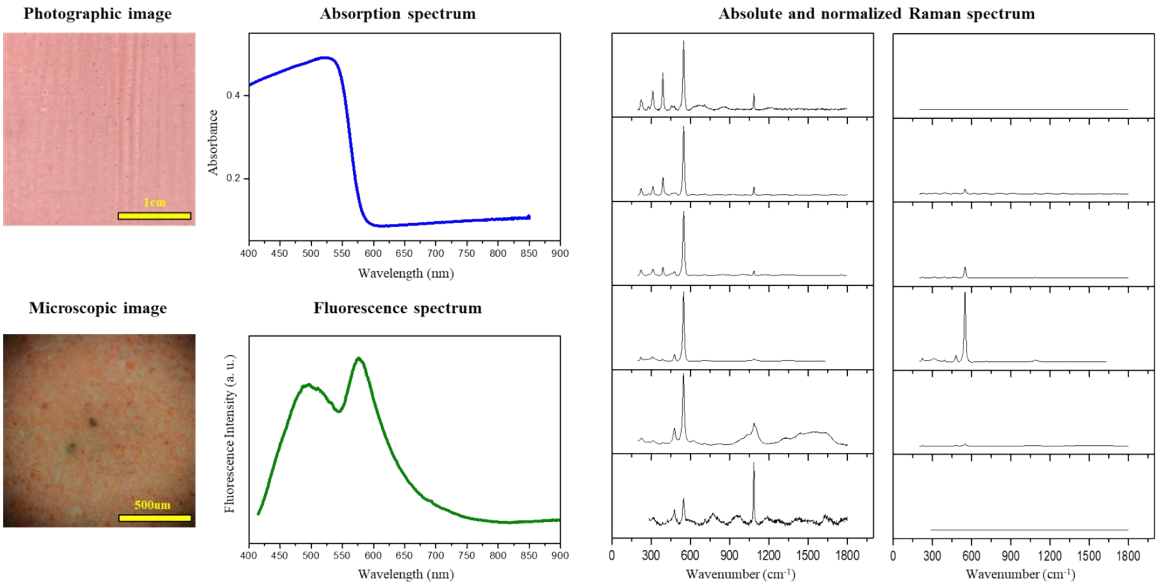

Yuk-saek (II), Red lead + Titanium white,  $\text{Pb}_3\text{O}_4 + \text{TiO}_2$  (C6)

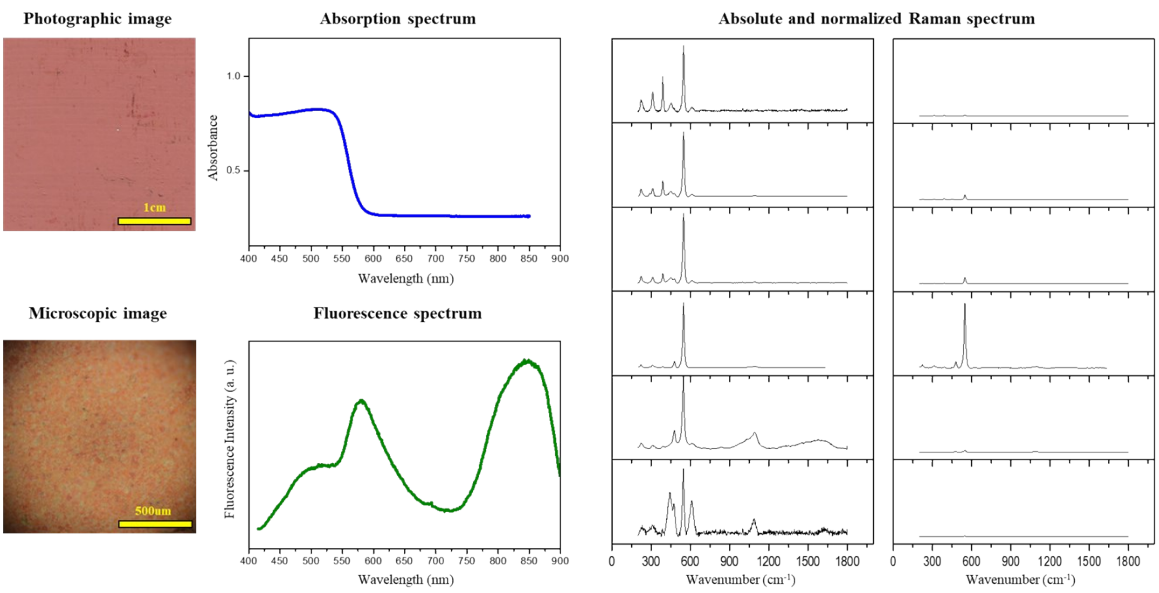



Figure S6. Fluorescence spectrum of both blues according to the laser excitation wavelength.

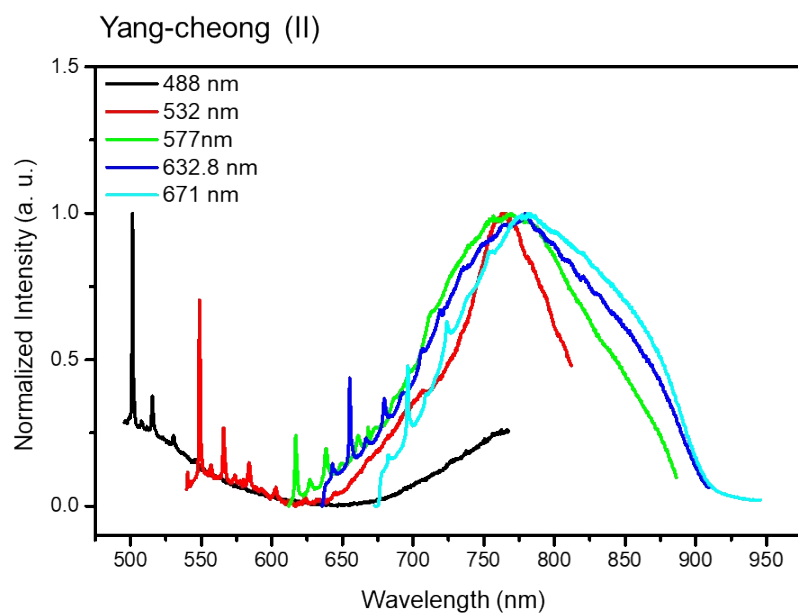

Supplement: d0an02363a1.pdf [file d0an02363a1.pdf]
